# Supplementary material for: Mechanistic Clues Provided by Concurrent Changes in the Expression of Genes Encoding the M1 Muscarinic Receptor, β-Catenin Signaling Proteins, and Downstream Targets in Adenocarcinomas of the Colon
Source: Front Physiol. 2022 Mar 16;13:857563. doi: 10.3389/fphys.2022.857563 (PMC8966224; doi:10.3389/fphys.2022.857563)
Supplement: Supplementary file 1 [file Table_1.XLSX]

## Sheet: supplementary1
Ensembl ID	log2fc	Adjusted P-value			Supplementary Table 1. log2fc of 72 genes downstream of β-catenin signaling in normal colon versus primary colon adenocarcinoma samples. Basic log2fc of 72 genes identified in the literature to be downstream of β-catenin signaling were assessed to identify differential expression in adenocarcinoma vs normal tissue.
ENSG00000163347	3.381	2.65e-28
ENSG00000126947	-1.21	2.07e-27
ENSG00000173175	-1.443	2.42e-27
ENSG00000171617	1.667	9.89e-25
ENSG00000105976	1.672	4.97e-24
ENSG00000122861	1.754	5.13e-24
ENSG00000183734	2.817	8.42e-24
ENSG00000156299	-0.5266	4.16e-23
ENSG00000136997	1.923	6.66e-23
ENSG00000125398	-1.873	1.39e-22
ENSG00000129473	-0.7461	4.92e-22
ENSG00000110092	1.514	1.19e-21
ENSG00000162104	-0.9039	7.31e-21
ENSG00000112715	1.077	1.99e-20
ENSG00000174233	-0.6883	3.35e-18
ENSG00000130816	0.8335	9.1e-18
ENSG00000198668	-0.6456	1.94e-17
ENSG00000089685	1.207	2.79e-17
ENSG00000138031	0.9163	8.43e-17
ENSG00000175592	1.85	8.69e-17
ENSG00000078295	-0.204	5.97e-16
ENSG00000198910	-1.409	7.13e-16
ENSG00000168646	1.529	9.62e-16
ENSG00000124181	0.7824	2.01e-15
ENSG00000146648	-0.6968	2.11e-15
ENSG00000026508	1.154	5.38e-15
ENSG00000112033	-0.8199	6.89e-14
ENSG00000075618	1.052	1.11e-13
ENSG00000070808	-0.169	1.45e-13
ENSG00000118515	-1.77	2.79e-13
ENSG00000182580	1.525	2.9e-13
ENSG00000137673	2.936	3.21e-13
ENSG00000139292	1.899	5.3e-13
ENSG00000085563	-1.623	4.37e-12
ENSG00000138795	1.023	4.49e-12
ENSG00000135100	0.3917	5.01e-12
ENSG00000196628	-0.3234	3.68e-11
ENSG00000125378	1.334	5.92e-11
ENSG00000137693	0.3507	1.55e-10
ENSG00000115738	-0.6868	1.98e-10
ENSG00000111859	-0.7579	7.55e-10
ENSG00000058085	0.8101	7.97e-10
ENSG00000147889	0.9868	1.83e-09
ENSG00000112081	0.2881	6.55e-09
ENSG00000133216	0.8549	3.1e-08
ENSG00000011422	-0.7052	8.21e-08
ENSG00000105650	-0.6642	1.4e-07
ENSG00000104371	1.261	7.82e-06
ENSG00000107984	0.3593	2.79e-05
ENSG00000134250	-0.2252	3.13e-05
ENSG00000197956	0.4016	0.000186958
ENSG00000095739	0.645	0.000531596
ENSG00000078401	-0.5451	0.000890376
ENSG00000137845	-0.1579	0.000935693
ENSG00000184502	0.1531	0.00152984
ENSG00000090776	0.2869	0.0035511
ENSG00000113722	-0.1836	0.00856925
ENSG00000178691	0.1084	0.0117297
ENSG00000118513	0.2063	0.0222171
ENSG00000129467	0.09091	0.0485909
ENSG00000041982	0.2856	0.0569342
ENSG00000007171	-0.4577	0.0655336
ENSG00000168283	-0.08623	0.0717171
ENSG00000091129	0.1325	0.131489
ENSG00000101384	-0.125	0.161951
ENSG00000065989	0.08183	0.292347
ENSG00000108055	0.04729	0.380244
ENSG00000121281	0.03454	0.636389
ENSG00000196154	-0.06829	0.670065
ENSG00000114315	0.03403	0.70522
ENSG00000184588	0.03397	0.745788
ENSG00000229344	0.04275	0.839408
